# Supplementary material
Source: Springer Nature journal article supplement (https://www.springermedizin.de/resource/supplementary/13054_2010_8694_MOESM2_ESM.pdf/9732812)

**African countries ( $n=263$ )**

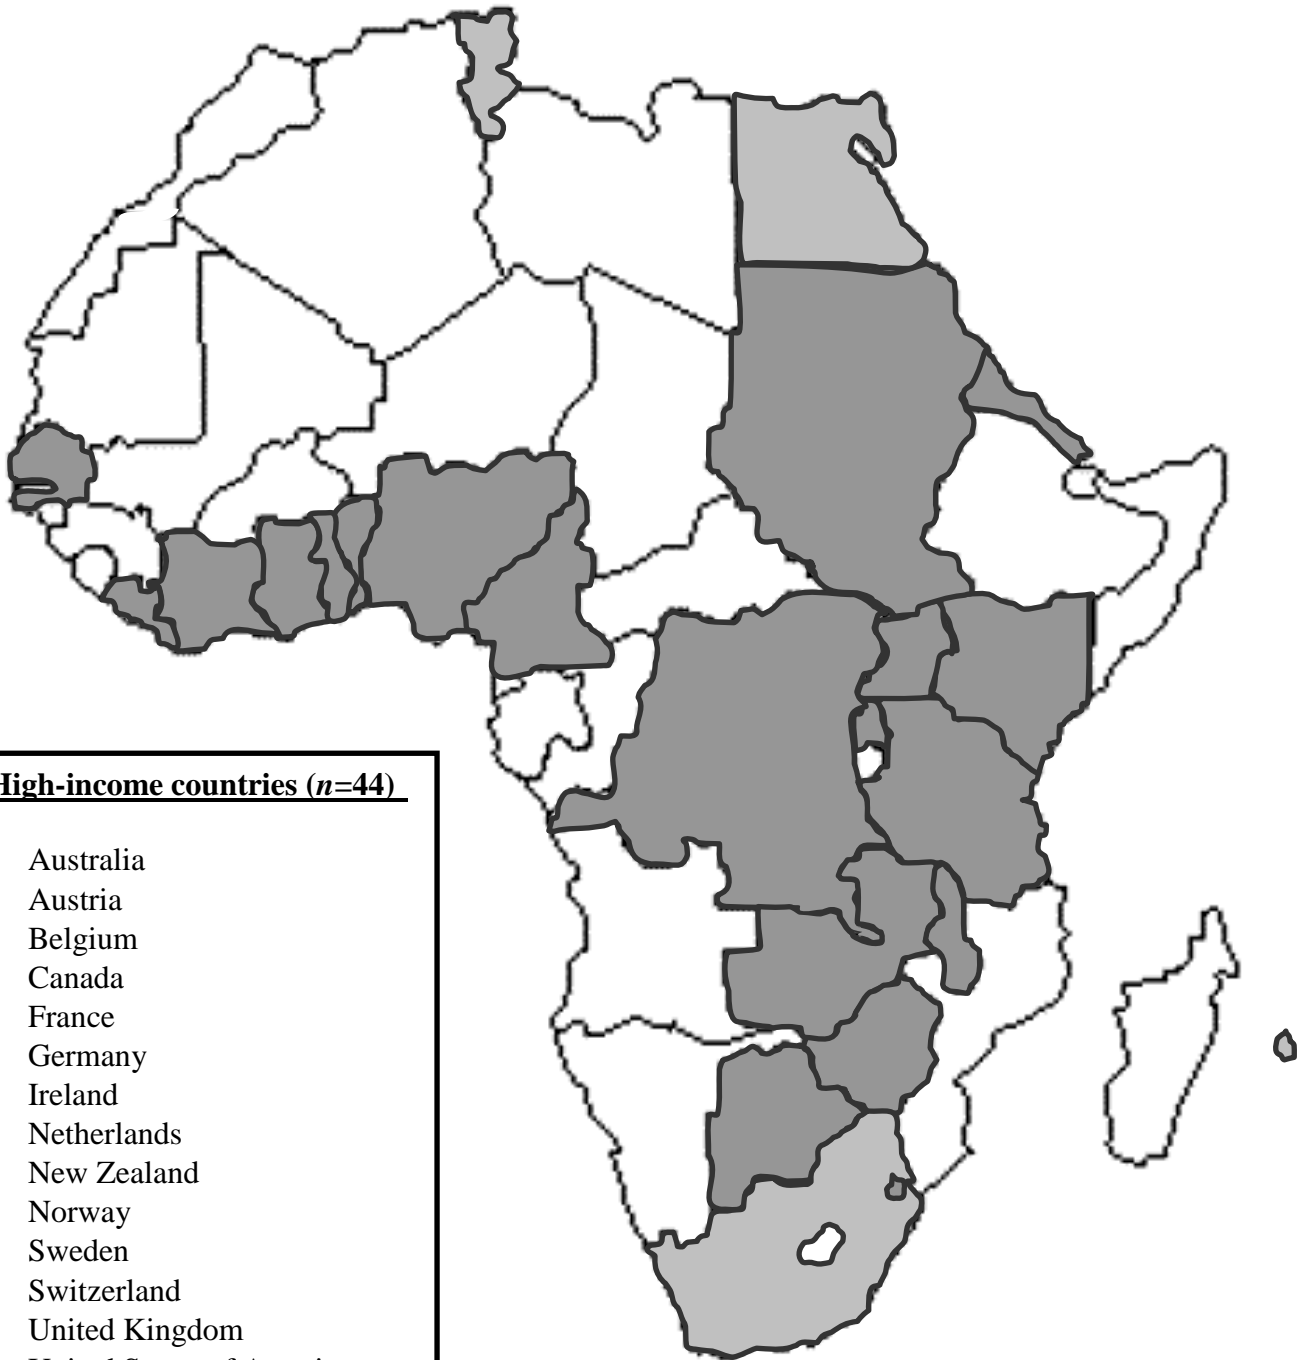

Supplement: MOESM2 [file 9732812]
